# Supplementary material for: Dietary Choices Impact on Greenhouse Gas Emissions: Determinants and Correlates in a Sample of Adults from Eastern Germany
Source: MDPI journal article supplement (doi:10.3390/su14073854), 2022-03-24
Supplement: s1 [file s1]

**Supplemental Table S1.** Sources of non-alcoholic beverages as contributors to greenhouse gas emissions in women and men

| Source                  | GHGE from<br>SHARP-ID in kg<br>CO <sub>2</sub> eq | Mean intake (SD) g/day per 2000 kcal |               |
|-------------------------|---------------------------------------------------|--------------------------------------|---------------|
|                         |                                                   | Women                                | Men           |
| Coffee                  | 0.6                                               | 546.7 (405.1)                        | 428.9 (373.1) |
| Tea                     | 0.7                                               | 105.7 (215.7)                        | 116.2 (210.3) |
| Infused /<br>herbal tea | 0.7                                               | 369.3 (531.2)                        | 193.7 (344.6) |
| Fruit juice             | 1.4                                               | 88.4 (153.7)                         | 95.8 (135.6)  |
| Soft drinks             | 0.5                                               | 25.3 (140.2)                         | 47.0 (162.9)  |
| Water                   | 0.2                                               | 1080.8 (821.4)                       | 677.1 (602.0) |

Abbreviations: GHGE, greenhouse gas emissions; SD, standard deviation.

**Supplemental Table S2.** Food consumption trends, and age and obesity characteristics among women that are single and married

|                                         | Single Women (N = 111)             |                             | Married Women (N = 290)            |                             |
|-----------------------------------------|------------------------------------|-----------------------------|------------------------------------|-----------------------------|
|                                         | % contributing to variance of GHGE | Mean (SD) g/d per 2000 kcal | % contributing to variance of GHGE | Mean (SD) g/d per 2000 kcal |
| <b>Consumption of major food groups</b> |                                    |                             |                                    |                             |
| Grains                                  | 20.5%                              | 157.2 (62.1)                | 17.2%                              | 158.9 (62.0)                |
| Vegetables                              | 10.3%                              | 195.6 (110.5)               | 10.5%                              | 181.8 (103.4)               |
| Starchy root or tubers                  | 0.0%                               | 109.3 (52.2)                | 2.2%                               | 111.1 (48.8)                |
| Legumes and nuts                        | 1.1%                               | 7.5 (6.7)                   | 0.4%                               | 7.8 (7.0)                   |
| Fruit                                   | 3.5%                               | 325.5 (192.1)               | 1.0%                               | 296.5 (183.8)               |
| Meat                                    | 4.5%                               | 99.6 (45.0)                 | 15.8%                              | 106.8 (43.7)                |
| Fish                                    | 9.5%                               | 17.5 (13.6)                 | 3.5%                               | 18.4 (15.5)                 |
| Dairy                                   | 32.0%                              | 300.0 (169.4)               | 27.1%                              | 234.6 (135.0)               |
| Eggs                                    | 0.0%                               | 20.3 (13.2)                 | 1.1%                               | 22.3 (15.0)                 |
| Sugar and confectionary                 | 5.7%                               | 105.2 (41.9)                | 0.8%                               | 107.8 (49.9)                |
| Fats and oils                           | 2.0%                               | 37.6 (12.7)                 | 1.1%                               | 35.9 (11.5)                 |
| Alcoholic beverages                     | 3.1%                               | 108.7 (127.3)               | 3.4%                               | 161.3 (224.2)               |
| Non-alcoholic beverages                 | 33.0%                              | 2375.4 (1184.6)             | 31.3%                              | 2155.3 (1231.7)             |
| <br>                                    |                                    |                             |                                    |                             |
| <b>Age</b>                              | <b>n (%)</b>                       |                             | <b>n (%)</b>                       |                             |
| < 60 years                              | 32 (29)                            |                             | 96 (33)                            |                             |
| ≥ 60 years                              | 79 (71)                            |                             | 194 (67)                           |                             |
| <br>                                    |                                    |                             |                                    |                             |
| <b>Obesity</b>                          | <b>n (%)</b>                       |                             | <b>n (%)</b>                       |                             |
| BMI < 30 kg/m <sup>2</sup>              | 84 (76)                            |                             | 221 (76)                           |                             |
| BMI ≥ 30 kg/m <sup>2</sup>              | 27 (24)                            |                             | 69 (24)                            |                             |

Abbreviations: BMI, body mass index; GHGE, greenhouse gas emissions; SD, standard deviation.
